# Supplementary material for: Synthesis and formation mechanisms of morphology-controllable indium-containing precursors and optical properties of the derived In2O3 particles
Source: Royal Society of Chemistry journal article supplement (doi:10.1039/c6ce00115g), 2016-01-01
Supplement: c6ce00115g1.pdf [file c6ce00115g1.pdf]

## Supplementary Information

### **Synthesis and formation mechanism of morphology-controllable indium containing precursors and optical properties of the derived In<sub>2</sub>O<sub>3</sub> particles**

Zhijie Lin<sup>a</sup>, Qi Zhu<sup>a</sup>, Yu Dong<sup>a</sup>, Shaohong Liu<sup>a,b</sup>, Ji-Guang Li<sup>c</sup>, Xiaodong Li<sup>a</sup>, Di Huo<sup>a</sup>,  
Mu Zhang<sup>a</sup>, Ming Xie<sup>b</sup>, Xudong Sun<sup>a\*</sup>

<sup>a</sup> Key Laboratory for Anisotropy and Texture of Materials (Ministry of Education),  
School of Materials and Metallurgy, Northeastern University, Shenyang, Liaoning  
110819, China

<sup>b</sup> State Key Laboratory of Advanced Technologies for Comprehensive Utilization of  
Platinum Metals, Kunming Institute of Precious Metals, Kunming, 650106, China

<sup>c</sup> Advanced Materials Processing Unit, National Institute for Materials Science, 1-2-1  
Sengen, Tsukuba, Ibaraki 305-0044, Japan

Email: xdsun@mail.neu.edu.cn

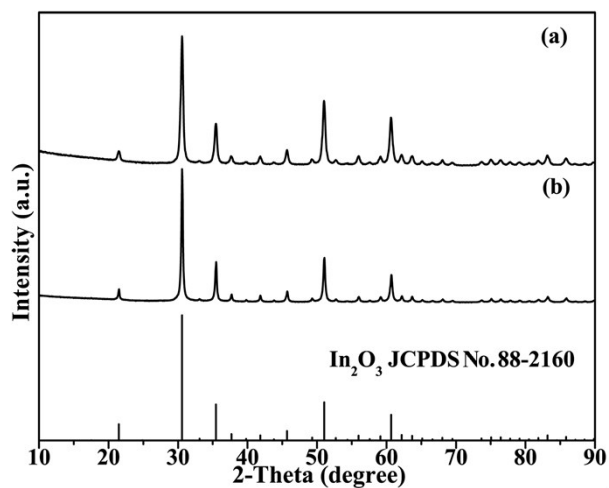

Fig. S1 XRD patterns of the  $\text{In}_2\text{O}_3$  oxides obtained by calcining (a) rods (S1) and (b) cubes (S2), respectively at 600 °C for 1h.

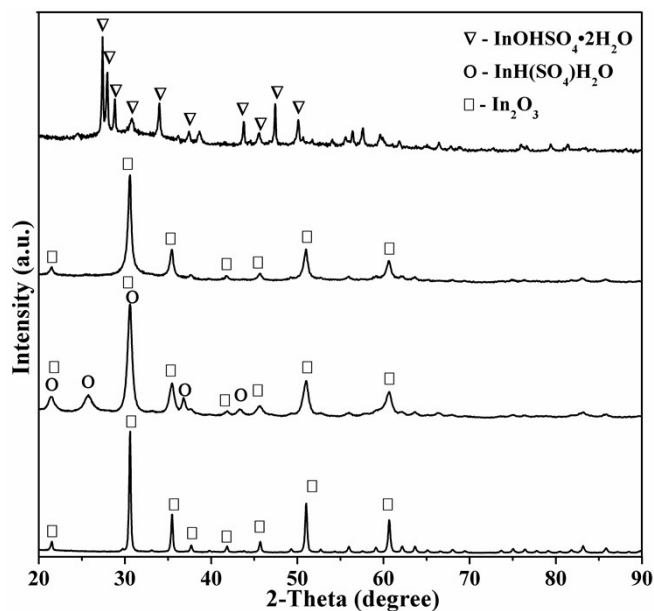

Fig. S2 XRD spectra showing the phase evolutions during calcination of the precursor at various temperatures in air.

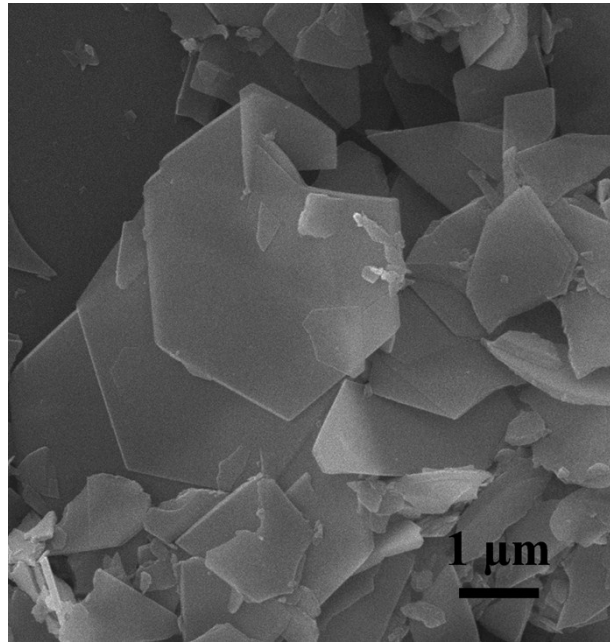

Fig. S3 FE-SEM images of the precursor synthesized with 0.06 M urea and 9 M  $\text{K}_2\text{SO}_4$  at 90 °C for 1 h.
